# Supplementary material
Source: PubMed Central journal article supplement (PMC8325018)
Supplement: dfc_heritability_final_si_r1_bhaa391.pdf [file dfc_heritability_final_si_r1_bhaa391.pdf]

## Dynamic Conditional Correlation Estimation

The Dynamic Conditional Correlation (DCC) method (Engle, 2002) is an example of a model-based multivariate volatility method, popular in finance, and recently introduced to neuroimaging (Lindquist et al., 2014). It provides a way to estimate conditional correlations between time series.

We begin by introducing generalized autoregressive conditional heteroscedastic (GARCH) models (Engle, 1982; Bollerslev, 1986), often used to model the volatility in univariate time series. These models express the conditional variance of a time series at time  $t$  as a linear combination of past values of the conditional variance and of the squared process itself. To illustrate, assume that we are observing a univariate process

$$y_t = \sigma_t \varepsilon_t$$

where  $\varepsilon_t$  is a  $N(0, 1)$  random variable and  $\sigma_t$  represents the time-varying variance term we want to model. A GARCH(1,1) process models the conditional variance as follows:

$$\sigma_t^2 = \omega + \alpha y_{t-1}^2 + \beta \sigma_{t-1}^2$$

where  $\omega > 0$ ,  $\alpha, \beta \geq 0$  and  $\alpha + \beta < 1$ . Here  $\alpha$  controls the influence of past values of the time series on the variance and  $\beta$  the influence of past values of the conditional variance on its present value.

In the DCC approach, we assume  $\mathbf{y}_t = \varepsilon_t$  is a bivariate mean zero time series with conditional covariance matrix  $\Sigma_t$ . The first order form of DCC can be expressed as follows:

$$\sigma_{i,t}^2 = \omega_i + \alpha_i y_{i,t-1}^2 + \beta_i \sigma_{i,t-1}^2 \text{ for } i=1, 2 \quad (1)$$

$$\mathbf{D}_t = \text{diag}\{\sigma_{1,t}, \sigma_{2,t}\} \quad (2)$$

$$\varepsilon_t = \mathbf{D}_t^{-1} \mathbf{e}_t \quad (3)$$

$$\mathbf{Q}_t = (1 - \theta_1 - \theta_2) \bar{\mathbf{Q}} + \theta_1 \varepsilon_{t-1} \varepsilon_{t-1}' + \theta_2 \mathbf{Q}_{t-1} \quad (4)$$

$$\mathbf{R}_t = \text{diag}\{\mathbf{Q}_t\}^{-1/2} \mathbf{Q}_t \text{diag}\{\mathbf{Q}_t\}^{-1/2} \quad (5)$$

$$\Sigma_t = \mathbf{D}_t \mathbf{R}_t \mathbf{D}_t \quad (6)$$

In Eqs. 1-3, univariate GARCH(1,1) models are fit (Eq. 1) to each of the two univariate time series that make up  $\mathbf{y}_t$ , and used to compute standardized residuals (Eq. 3). In Eq. 4, an exponentially weighted moving average is applied to the standardized residuals and used to compute a non-normalized version of the time-varying correlation matrix. Here  $\mathbf{Q}$  represents the unconditional covariance matrix of  $\varepsilon_t$  and  $(\theta_1, \theta_2)$  are non-negative scalars satisfying  $0 < \theta_1 + \theta_2 < 1$ . Eq. 5 is a rescaling that ensures a proper correlation matrix is created, while Eq. 6 computes the time-varying covariance matrix. Model parameters  $(\omega_1, \alpha_1, \beta_1, \omega_2, \alpha_2, \beta_2, \theta_1, \theta_2)$  can be estimated using a two-step approach. This approach has been shown (Engle and Sheppard, 2001; Engle, 2002) to provide estimates that are consistent and asymptotically normal with a variance that can be computed using the generalized method of moments approach.

Figure S1. Network heritability estimates in each session for the DCC variance, DCC mean, and static connectivity measures. VN = visual network, SMN = sensorimotor network, VAN = ventral attention network, DAN = dorsal attention network, DMN = default mode network, FPN = frontoparietal network

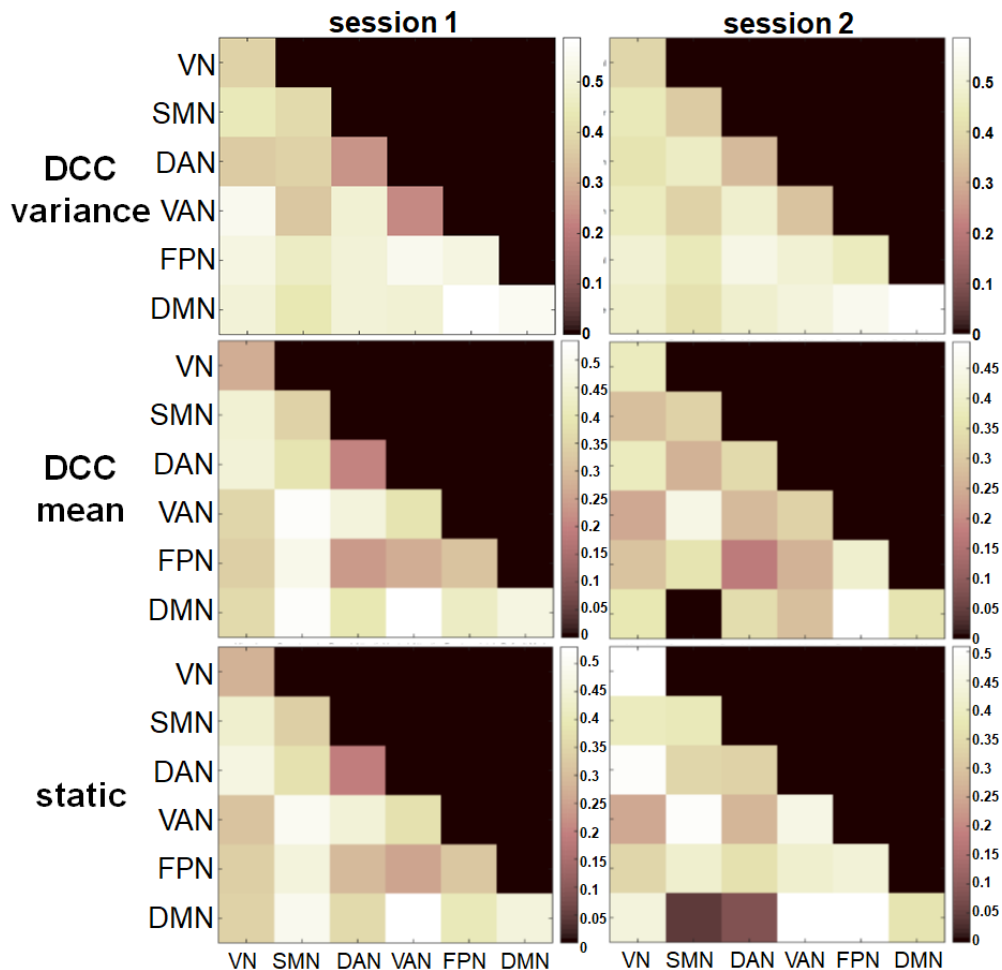

Table S1. Network heritability estimates in each session for the DCC variance, DCC mean, and static connectivity measures computed at different ICA dimensionalities. VN = visual network, SMN = sensorimotor network, VAN = ventral attention network, DAN = dorsal attention network, DMN = default mode network, FPN = frontoparietal network

| <b>metric</b>       | <b>dimensionality</b> | <b>session</b> | <b>h<sup>2</sup> min</b> | <b>h<sup>2</sup> max</b> | <b>h<sup>2</sup> mean</b> |
|---------------------|-----------------------|----------------|--------------------------|--------------------------|---------------------------|
| <b>DCC variance</b> | 25                    | 1              | 0.28                     | 0.50                     | 0.41                      |
|                     |                       | 2              | 0.24                     | 0.49                     | 0.36                      |
|                     | 50                    | 1              | 0.27                     | 0.53                     | 0.43                      |
|                     |                       | 2              | 0.27                     | 0.53                     | 0.41                      |
|                     | 100                   | 1              | 0.27                     | 0.60                     | 0.44                      |
|                     |                       | 2              | 0.27                     | 0.57                     | 0.45                      |
|                     | 200                   | 1              | 0.33                     | 0.58                     | 0.46                      |
|                     |                       | 2              | 0.33                     | 0.55                     | 0.44                      |
|                     | 300                   | 1              | 0.24                     | 0.59                     | 0.45                      |
|                     |                       | 2              | 0.32                     | 0.59                     | 0.45                      |
| <b>DCC mean</b>     | 25                    | 1              | 0.00                     | 0.56                     | 0.30                      |
|                     |                       | 2              | 0.04                     | 0.45                     | 0.27                      |
|                     | 50                    | 1              | 0.00                     | 0.53                     | 0.32                      |
|                     |                       | 2              | 0.00                     | 0.47                     | 0.32                      |
|                     | 100                   | 1              | 0.04                     | 0.53                     | 0.39                      |
|                     |                       | 2              | 0.00                     | 0.64                     | 0.34                      |
|                     | 200                   | 1              | 0.13                     | 0.50                     | 0.34                      |
|                     |                       | 2              | 0.01                     | 0.46                     | 0.26                      |
|                     | 300                   | 1              | 0.21                     | 0.53                     | 0.39                      |
|                     |                       | 2              | 0.00                     | 0.49                     | 0.31                      |
| <b>static</b>       | 25                    | 1              | 0.00                     | 0.56                     | 0.30                      |
|                     |                       | 2              | 0.16                     | 0.49                     | 0.32                      |
|                     | 50                    | 1              | 0.00                     | 0.52                     | 0.31                      |
|                     |                       | 2              | 0.23                     | 0.55                     | 0.36                      |
|                     | 100                   | 1              | 0.03                     | 0.54                     | 0.37                      |
|                     |                       | 2              | 0.00                     | 0.59                     | 0.36                      |
|                     | 200                   | 1              | 0.15                     | 0.47                     | 0.34                      |
|                     |                       | 2              | 0.00                     | 0.51                     | 0.31                      |
|                     | 300                   | 1              | 0.19                     | 0.53                     | 0.38                      |
|                     |                       | 2              | 0.05                     | 0.51                     | 0.37                      |

Table S2. Individual connection heritability estimates in each session for the DCC variance, DCC mean, and static connectivity measures computed at the ICA dimensionality of 300 components.

| metric              | dimensionality | session | h <sup>2</sup> min | h <sup>2</sup> max | h <sup>2</sup> mean |
|---------------------|----------------|---------|--------------------|--------------------|---------------------|
| <b>DCC variance</b> | 300            | 1       | 0.00               | 0.62               | 0.33                |
|                     |                | 2       | 0.00               | 0.55               | 0.31                |
| <b>DCC mean</b>     | 300            | 1       | 0.00               | 0.59               | 0.26                |
|                     |                | 2       | 0.00               | 0.63               | 0.22                |
| <b>static</b>       | 300            | 1       | 0.00               | 0.62               | 0.27                |
|                     |                | 2       | 0.00               | 0.65               | 0.27                |

## References

Bollerslev, T. (1986). Generalized autoregressive conditional heteroskedasticity. *Journal of econometrics*, 31(3):307–327.

Engle, R. F. (1982). Autoregressive conditional heteroscedasticity with estimates of the variance of United Kingdom inflation. *Econometrica: Journal of the Econometric Society*, pages 987–1007.

Engle, R. F. and Sheppard, K. (2001). Theoretical and empirical properties of dynamic conditional correlation multivariate garch. Technical report, National Bureau of Economic Research.

Engle, R. (2002). Dynamic conditional correlation: A simple class of multivariate generalized autoregressive conditional heteroskedasticity models. *Journal of Business & Economic Statistics*, 20(3):339–350

Lindquist, M. A., Xu, Y., Nebel, M. B., and Caffo, B. S. (2014). Evaluating dynamic bivariate correlations in resting-state fmri: A comparison study and a new approach. *NeuroImage*, 101:531–546.
